# Supplementary material for: Three European Retrospective Real-World Chart Review Studies to Determine the Effectiveness of Flash Glucose Monitoring on HbA1c in Adults with Type 2 Diabetes
Source: Springer Nature journal article supplement (doi:10.1007/s13300-019-00741-9), 2019-12-12
Supplement: MOESM1 [file 17742108]

**Supplementary Material**

Three European retrospective real-world chart review studies to determine the effectiveness of flash glucose monitoring on HbA1c in adults with type 2 diabetes.

Kröger J,1 Fasching P,2 Hanaire H.3

Table S1: Ethics Committees for Study Sites in Germany Austria

| **Germany** | Hamburg | Ethics Committee of Hamburg Medical Association. Hamburg Medical Association, Postfach 76 01 09, 22051 Hamburg |
| --- | --- | --- |
| Bosenheim | Rhineland Palatinate State Medical Association Ethics Committee. Postfach 29 26 · 55019 Mainz |
| Munster | Ethics Committee of Westphalia-Lippe Medical Association and of Westphalian Wilhelm University. Gartenstraße 210-214, 48147 Münster, Germany. |
| Hanover | Lower Saxony Medical Association Körperschaft des öffentlichen Rechts, Ethics Committee Office, Karl-Wiechert-Allee 18-22, 30625, Hanover, Germany. |
| Bavaria | Ethics Committee of the Bavarian Medical Association (Ethik-Kommission der Bayerischen Landesärztekammer - EK der BLAK).   Mühlbaurstraße 16, 81677, München, Bavaria, Germany |
| **Austria** | Innsbruck | Ethics Committee of the Medical University of Innsbruck. Innrain 43, A-6020, Innsbruck |
| Salzburg | State of Salzburg Ethics Committee.  Michael-Pacher-Straße 36, Postfach 527,  5010 Salzburg |
| Stockerau | Ethics Committee for the State of Lower Austria at the Headquareters of the Office of the State Government of Lower Austria Health and Social Affairs Group - Department for Health Care 3109 St. Pölten, Landhausplatz 1 |
| Vienna | Ethikkommission der Stadt Wien, Thomas-Klestil-Platz 8, A-1030 Wien, 1030 Vienna, Austria. |
| Graz | Ethikkommission der Medizinischen Universität Graz, LKH – Universitätsklinikum – Eingangsgebäude, Auenbruggerplatz 2, 3.OG, A – 8036 GRAZ, Austria. |
